# Supplementary material for: Developing a rapid and highly efficient cowpea regeneration, transformation and genome editing system using embryonic axis explants
Source: PubMed Central journal article supplement (PMC8252785; doi:10.1111/tpj.15202), 2021-03-16
Supplement: TPJ-106-817-s001.pdf [file TPJ-106-817-s001.pdf]

# Supporting information

(a)

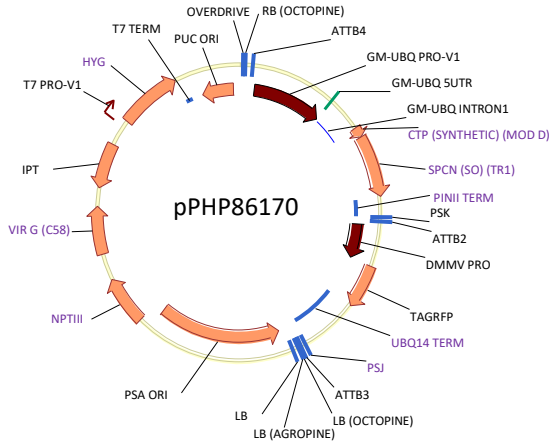

(b)

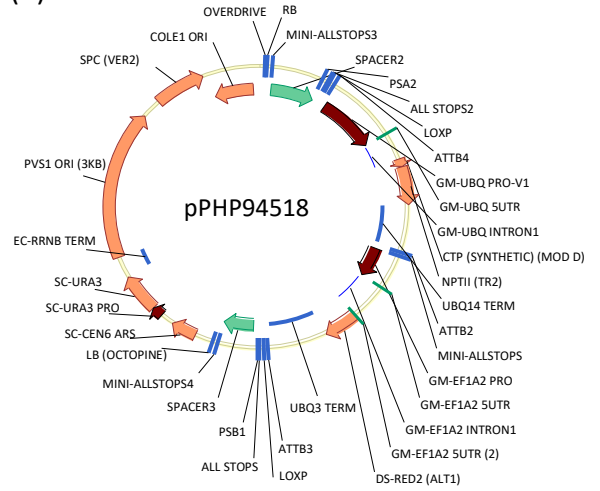

(c)

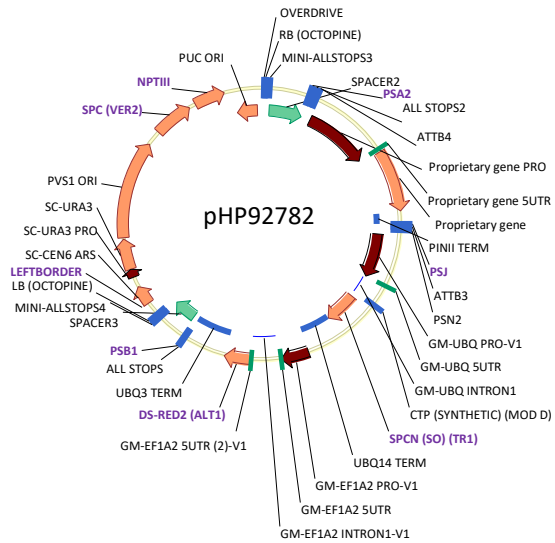

(d)

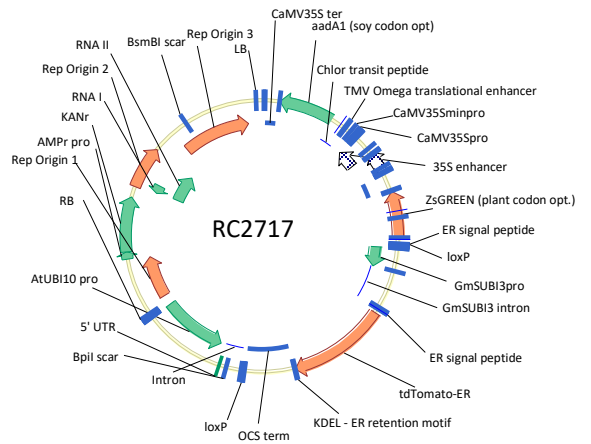

(e)

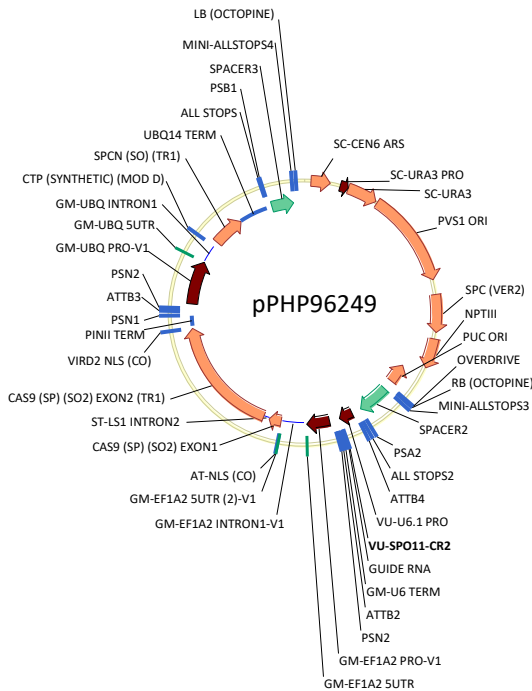

**Figure S1.** Schematic representation of the molecular components of constructs used in this study. (a) pPHP86170, (b) pPHP84518, (c) pPHP92782 and (e) pPHP96249 were transformed with ternary vector system using pPHP71539 as helper in *Agrobacterium* strain LBA4404 Thy-. The genes and elements highlighted in purple are covered by event quality assays (Table S10). (d) RC2717 is a modified pCambia vector transformed into *Agrobacterium* AGL1 strain. (e) Gene editing construct for *Vu-SPO11*.

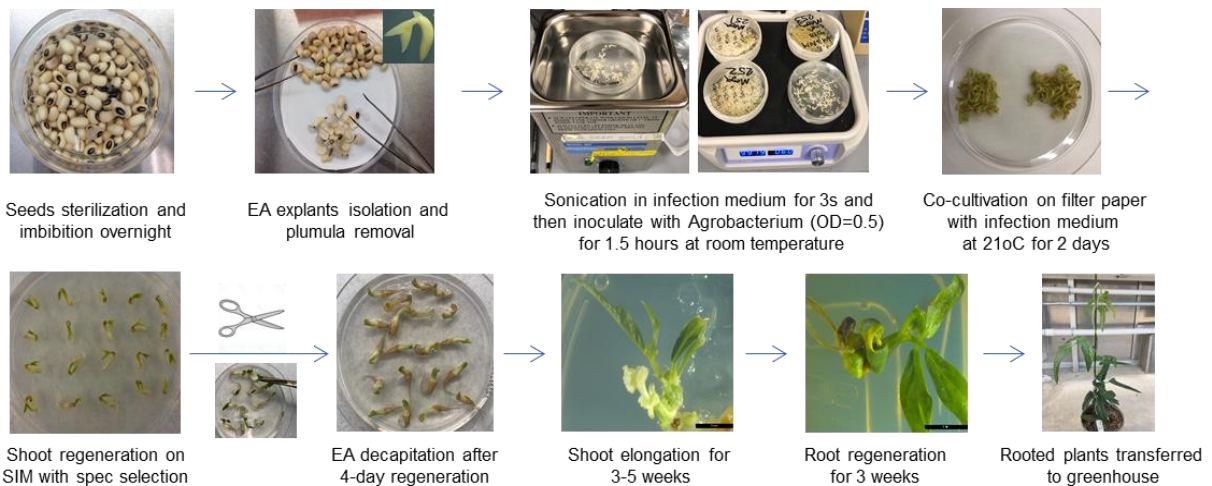

**Figure S2.** Diagram of the cowpea EA-based *Agrobacterium*-mediated transformation process. The detailed transformation procedure is described in Materials and Methods.

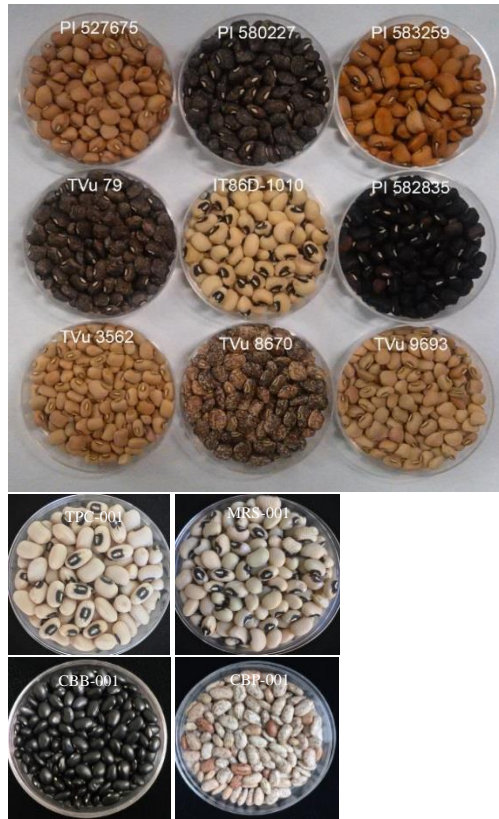

**Figure S3.** Dry mature seeds of selected accessions of cowpea and common bean.

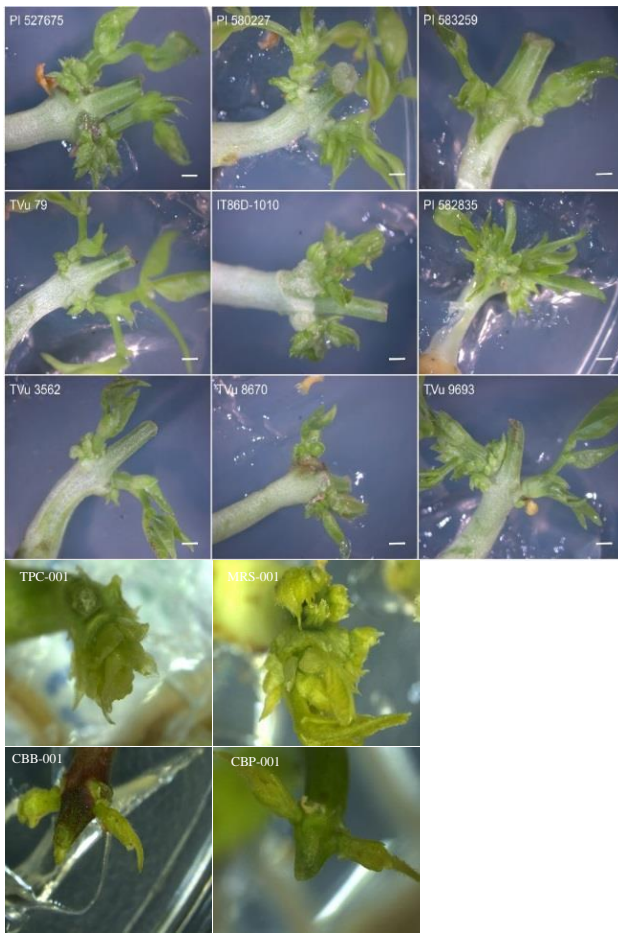

**Figure S4.** Shoot organogenesis of selected accessions of cowpea and common bean.

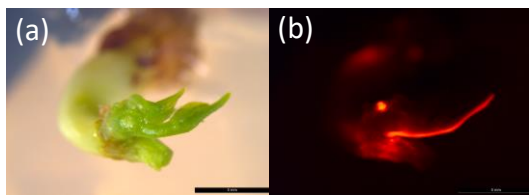

**Figure S5.** Development of chimeric event using *CTP-NPTII/G418* selection system. (a) Bright field image. (b) Fluorescence image under RFP filter.

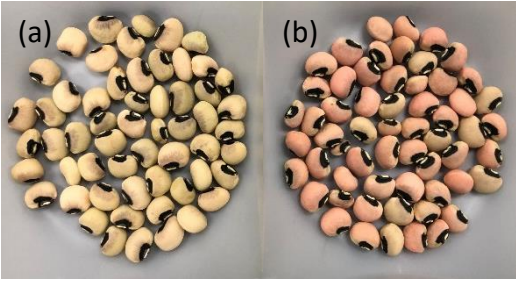

**Figure S6.** Transgene segregation in the progeny. (a) Mature wild-type cowpea IT86D-1010 seeds. (b) Segregated T1 seeds (Event ID 125739950) in IT86D-1010 background harvested from T0 plant containing the *proGM-EF1A2:Ds-RED* as visual marker.

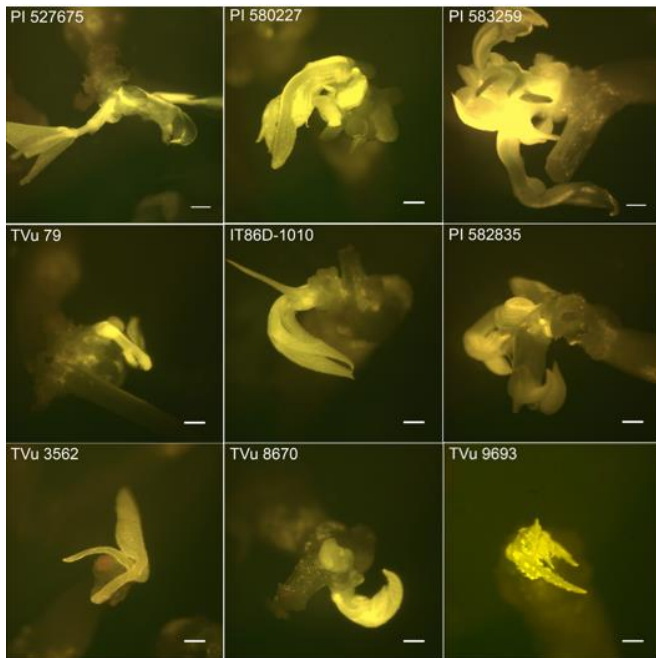

**Figure S7.** Formation of transgenic shoots expressing *TdTomato* on the EA explants of nine cowpea germplasm lines after 14-d culture on SIM. bar = 1 mm.

Vu-SPO11-CR2

5' - CTTTTGTGCCTCCGATTTGCCGTGCGGAAAGGAAGCTCTCACACTCCGCACGAAATCCCGCGGCACAGACTAG - 3'

3' - GAAAACACGGAGGCTAAACGGCACGCCTTTCCTTCGAGAGTGTGAGGCGTGCTTTAGGGCGCGGTGTCTGATC - 5'

**Figure S8.** Diagram of the DNA sequence of *VU-SPO11* target site in Exon 3. The three-nucleotide sequence highlighted in grey indicate the corresponding PAM motif recognized by the Cas9 protein. The sgRNA target site is underlined.

**Table S1** Master plate medium

|                                          |           |
|------------------------------------------|-----------|
| Glucose                                  | 5 g/l     |
| Bacto agar                               | 15 g/l    |
| Ferrous sulfate heptahydrate             | 2.5 mg/l  |
| Potassium phosphate dibasic              | 3 g/l     |
| Sodium phosphate, monobasic              | 1 g/l     |
| Ammonium chloride                        | 1 g/l     |
| Magnesium sulfate heptahydrate           | 0.3 g/l   |
| Potassium chloride                       | 0.15 g/l  |
| Calcium chloride dihydrate               | 11.4 mg/l |
| Thymidine (only for LBA4404 THY- strain) | 50 mg/l   |
| Antibiotics*                             |           |

\*100 mg/l kanamycin, 100 mg/l carbenicillin and 25 mg/l rifampicin were used for AGL1 carrying RC2717.

50mg/l gentamycin and 50 mg/l kanamycin were used for LBA4404 Thy- carrying pPHP86170/pPHP71539.

50mg/l gentamycin and 50 mg/l spectinomycin were used for LBA4404 Thy- carrying pPHP94518/pPHP71539 and pPHP92782/ pPHP71539.

**Table S2** Working plate medium

|                                          |         |
|------------------------------------------|---------|
| Yeast extract (BD DIFCO)                 | 5 g/l   |
| Peptone                                  | 10 g/l  |
| Sodium chloride                          | 5 g/l   |
| Bacto agar                               | 15 g/l  |
| Thymidine (only for LBA4404 THY- strain) | 50 mg/l |
| Antibiotics*                             |         |

\*100 mg/l kanamycin, 100 mg/l carbenicillin and 25 mg/l rifampicin were used for AGL1 carrying RC2717.

50mg/l gentamycin and 50 mg/l kanamycin were used for LBA4404 Thy- carrying pPHP86170/pPHP71539.

50mg/l gentamycin and 50 mg/l spectinomycin were used for LBA4404 Thy- carrying pPHP94518/pPHP71539 and pPHP92782/ pPHP71539.

**Table S3** Infection medium (IM)

|                                                                                             |                 |
|---------------------------------------------------------------------------------------------|-----------------|
| MS salt                                                                                     | 1 x             |
| MS vitamins                                                                                 | 1 x             |
| MES                                                                                         | 20 Mm (3.9 g/l) |
| Sucrose (w/v)                                                                               | 30 g/l          |
| pH                                                                                          | 5.4             |
| BAP                                                                                         | 0.5 mg/l        |
| Kinetin                                                                                     | 0.5 mg/l        |
| GA3                                                                                         | 0.25 mg/l       |
| Acetosyringone                                                                              | Add fresh       |
| L-cysteine                                                                                  | 400 mg/l        |
| BCDA (bathocuproinedisulfonic acid disodium salt)<br>(filter sterilized stock 125mM)        | 800 µL stock    |
| Thymidine (only for LBA4404 THY-)                                                           | 50 mg/l         |
| Polyvinylpyrrolidone (PVP40)                                                                | 1 mg/l          |
| Acetosyringone (stock 1M; final 200 µM)                                                     | 0.2 mL          |
| Dithiothrietol (DTT, stock 1M, filter sterilized<br>aliquot and stored at -80°C; final 1Mm) | 1 mL            |

**Table S4** Bean germination medium (BGM)

|                                         |              |
|-----------------------------------------|--------------|
| Sucrose                                 | 25 g/l       |
| Thiamine Hydrochloride                  | 1.34 mg/l    |
| Nicotinic acid                          | 0.5 mg/l     |
| Pyridoxine Hydrochloride                | 0.82 mg/l    |
| EDTA disodium                           | 3.348 mg/l   |
| Ferrous sulfate heptahydrate            | 2.502 mg/l   |
| Boric acid                              | 1.86 mg/l    |
| Manganese sulfate, monohydrate          | 5.07 mg/l    |
| Zinc sulfate, heptahydrate              | 2.58 mg/l    |
| Potassium iodide                        | 0.249 mg/l   |
| Sodium molybdate dihydrate              | 0.216 mg/l   |
| Cupric sulfate pentahydrate             | 0.00075 mg/l |
| Cobalt chloride hexahydrate             | 0.00075 mg/l |
| Calcium chloride dihydrate              | 0.176 g/l    |
| Potassium nitrate                       | 0.505 g/l    |
| Ammonium nitrate                        | 0.24 g/l     |
| Potassium phosphate monobasic anhydrous | 0.027 g/l    |
| Magnesium sulfate heptahydrate          | 0.493 g/l    |
| TC agar (phytotechnology A296)          | 6 g/l        |

**Table S5** Shoot induction medium (SIM)

|                       |                 |
|-----------------------|-----------------|
| MS salt               | 1 x             |
| MS vitamins           | 1 x             |
| MES                   | 3 Mm (0.59 g/l) |
| Sucrose (w/v)         | 30 g/l          |
| Agar, DIFCO (w/v)     | 8 g/l           |
| pH                    | 5.6             |
| BAP                   | 0.5 mg/l        |
| Kinetin               | 0.5 mg/l        |
| Antibiotic selection* |                 |
| Polyvinylpyrrolidone  | 1 mg/l          |
| Silver nitrate        | 2 mg/l          |

\*25 mg/l spectinomycin and 15 mg/l meropenem was used for EA explants which transformation was carried out through LBA4404 Thy- strain-mediated transformation.

50 mg/l spectinomycin and 15 mg/l meropenem was used for EA explants which transformation was carried out through AGL1 strain-mediated transformation for the first 2 weeks culture and 50 mg/l spectinomycin and 30 mg/l meropenem after the first 2 weeks culture.

**Table S6** Rooting induction medium (RIM)

|                       |                 |
|-----------------------|-----------------|
| MS salt               | 1 x             |
| MS vitamins           | 1 x             |
| MES                   | 3 Mm (0.59 g/l) |
| Sucrose (w/v)         | 30 g/l          |
| Agar, DIFCO (w/v)     | 8 g/l           |
| pH                    | 5.6             |
| IBA                   | 0.1 mg/l        |
| Antibiotic selection* |                 |
| Polyvinylpyrrolidone  | 1 mg/l          |
| Sliver nitrate        | 2 mg/l          |

\*50 mg/l spectinomycin and 30 mg/l meropenem used for transgenic shoots which transformation were carried out through AGL1 strain-mediated transformation after the first 2 weeks culture.

**Table S7** Shoot elongation medium (SEM)

|                       |                 |
|-----------------------|-----------------|
| MS salts              | 1 x             |
| MS vitamins           | 1 x             |
| MES                   | 3 mM (0.59 g/l) |
| Sucrose (w/v)         | 30 g/l          |
| Agar (w/v)            | 8 g/l           |
| pH                    | 5.6             |
| GA                    | 0.5 mg/l        |
| Kinetin               | 0.1 mg/l        |
| Asparagine            | 50 mg/l         |
| Antibiotic selection* |                 |

\*25 mg/l spectinomycin and 15 mg/l meropenem used for transgenic shoots which transformation was carried through LBA4404 Thy- strain-mediated transformation.

50 mg/l spectinomycin and 30 mg/l meropenem used for transgenic shoots which transformation was carried out by AGL1 strain-mediated transformation.



**Table S8 OMS**

|                   |                 |
|-------------------|-----------------|
| MS salts          | 1 x             |
| MS vitamins       | 1 x             |
| MES               | 3 Mm (0.59 g/l) |
| Sucrose (w/v)     | 30 g/l          |
| Agar, DIFCO (w/v) | 8 g/l           |
| pH                | 5.6             |

**Table S9** Shoot organogenesis of selected accessions of cowpea and common bean

| Germplasm accessions  | # of EAs | # of EAs with single shoot (%) | # of EAs with multiple shoots (%) | % Explants with shoots |
|-----------------------|----------|--------------------------------|-----------------------------------|------------------------|
| <i>Cowpea</i>         |          |                                |                                   |                        |
| IT86D-1010            | 36       | 0 (0)                          | 28 (78)                           | 78                     |
| PI 527675             | 36       | 0 (0)                          | 29 (81)                           | 81                     |
| PI 580227             | 36       | 2 (6)                          | 26 (72)                           | 78                     |
| PI 582835             | 29       | 1 (3)                          | 22 (76)                           | 79                     |
| PI 583259             | 36       | 3 (8)                          | 17 (47)                           | 56                     |
| TVu 8670              | 36       | 2 (6)                          | 22 (61)                           | 67                     |
| TVu 3562              | 37       | 4 (11)                         | 21 (57)                           | 68                     |
| TVu 9693              | 36       | 0 (0)                          | 22 (61)                           | 61                     |
| TVu 79                | 36       | 1 (3)                          | 28 (78)                           | 81                     |
| <i>Mexican cowpea</i> |          |                                |                                   |                        |
| TPC-001               | 50       | 6 (12)                         | 12 (24)                           | 36                     |
| MRS-001               | 50       | 5 (10)                         | 14 (28)                           | 38                     |
| <i>Common bean</i>    |          |                                |                                   |                        |
| CBB-001               | 50       | 4 (8)                          | 11 (22)                           | 30                     |
| CBP-001               | 50       | 6 (12)                         | 8 (16)                            | 30                     |

**Table S10** Primers used for event quality assay

| Event quality assay | Assay type                             | Forward primer              | Reverse primer                  |
|---------------------|----------------------------------------|-----------------------------|---------------------------------|
| <i>LBS</i>          | Endogenous control                     | CACATACCTCCAGTGAGTCCCTTA    | TCGAAGCATCTACTAACTACAGAAGAATTAA |
| <i>Ds-RED</i>       | Copy number                            | AAGTCCATCTACATGGCCAAGAA     | TGGGAGGTGATGTCCAGCTT            |
| <i>PSJ</i>          | Copy number                            | GCTAGTAGACGCTGCTAGTGACTAAGG | GCACTTAGGAGCGAAGACTAACG         |
| <i>SPCN</i>         | Copy number                            | CTGCCCGCAATGCTCTT           | ATTACCACTGGACCGTCACAGA          |
| <i>PSA2</i>         | Copy number and full insert intactness | CATGAAGCGCTCACGGTTACTAT     | TCGTACGCTACTGCCACCAA            |
| <i>PSB1</i>         | Copy number and full insert intactness | TGATTCCGATGACTTCGTAGGTT     | GCTAATCGTAAGTGACGCTTGG          |
| <i>CTP</i>          | Copy number                            | TGGCTGCAACTACTCTTACATCTG    | TGTAAGTTGAAAGGAGCACTTGGT        |
| <i>UBQ14_TERM</i>   | Copy number                            | CAGAACCAGAATCCCTTCATATC     | TGACGGCTGGGACTTCTTTG            |
| <i>HYGROMYCIN</i>   | Vector backbone                        | CAGCGAGAGCCTGACCTATTG       | CAGCGAGAGCCTGACCTATTG           |
| <i>VIRG</i>         | Vector backbone                        | TGCTCCGAGACGGTCGAT          | CAGGCAGGTCTTGCAACGT             |
| <i>SPC</i>          | Vector backbone                        | GCGCTGCCATTCTCCAAAT         | ATCATTCCGTGGCGTTATCC            |
| <i>LEFTBORDER</i>   | Vector backbone                        | GATCTCGCGGAGGGTAGCA         | CGAGGAGATGATATTTGATCACA         |
| <i>NPTIII</i>       | Vector backbone                        | CCGATGTGGATTGCGAAAA         | GCTCGCGGGATCTTTAA               |

**Table S11** Primers for CRISPR/Cas target site

| Gene Target  | Forward Primer        | Reverse Primer            |
|--------------|-----------------------|---------------------------|
| VU-SPO11-CR2 | TCCAATAATCACCGTTTCACC | GCACAGACTAGGTCACCTCTCCTTT |

**Table S12** Sequence changes from Cas9 edited plants

| Event ID | Allele Change              | $\Delta$ | Allele read percentage |
|----------|----------------------------|----------|------------------------|
| 1        | GC[-G]GAA                  | -1bp     | 94%                    |
| 2        | GCGGAA                     | Wildtype | 86%                    |
| 3        | GCGGAA                     | Wildtype | 88%                    |
| 4        | C[-CGTG]CGGAA              | -4bp     | 42%                    |
| 4        | GC[+G]GGAA                 | +1bp     | 37%                    |
| 4        | GCGGAA                     | Wildtype | 16%                    |
| 5        | GCGGAA                     | Wildtype | 66%                    |
| 5        | GC[-G]GAA                  | -1bp     | 9%                     |
| 6        | GCGGAA                     | Wildtype | 57%                    |
| 6        | GC[-G]GAA                  | -1bp     | 18%                    |
| 7        | GCGGAA                     | Wildtype | 48%                    |
| 7        | GC[-G]GAA                  | -1bp     | 16%                    |
| 7        | GC[+G]GGAA                 | +1bp     | 6%                     |
| 8        | GCGGAA                     | Wildtype | 45%                    |
| 8        | GC[-G]GAA                  | -1bp     | 15%                    |
| 9        | G[-CGGAAAGGAAGCTCTCACACTC] | -22b     | 52%                    |
| 9        | GC[+G]GGAA                 | +1bp     | 42%                    |
| 10       | GCGGAA                     | Wildtype | 55%                    |
| 10       | GC[+G]GGAA                 | +1bp     | 38%                    |
| 11       | GCGGAA                     | Wildtype | 88%                    |
| 12       | GC[-GGA]A                  | -3bp     | 40%                    |
| 12       | GC[+G]GGAA                 | +1bp     | 31%                    |
| 12       | GCGGAA                     | Wildtype | 23%                    |
| 13       | GC[-G]GAA                  | -1bp     | 74%                    |
| 13       | GCGGAA                     | Wildtype | 19%                    |
| 14       | [-GCG]GAA                  | -3bp     | 39%                    |
| 14       | [-GC]GGAA                  | -2bp     | 34%                    |
| 14       | GCGGAA                     | Wildtype | 20%                    |
| 15       | [-GCG]GAA                  | -3bp     | 38%                    |
| 15       | [-GC]GGAA                  | -2bp     | 33%                    |
| 15       | GCGGAA                     | Wildtype | 14%                    |
| 16       | GCGGAA                     | Wildtype | 91%                    |
| 17       | GCGGAA                     | Wildtype | 51%                    |
| 17       | GC[-G]GAA                  | -1bp     | 12%                    |
| 18       | GCGGAA                     | Wildtype | 85%                    |
| 19       | GCGGAA                     | Wildtype | 88%                    |
| 20       | GCGGAA                     | Wildtype | 38%                    |
| 20       | GC[-G]GAA                  | -1bp     | 16%                    |
| 21       | GCGGAA                     | Wildtype | 43%                    |
| 21       | GC[-G]GAA                  | -1bp     | 18%                    |
| 21       | GC[+G]GGAA                 | +1bp     | 8%                     |
| 22       | GCGGAA                     | Wildtype | 49%                    |
| 22       | GC[-G]GAA                  | -1bp     | 11%                    |
| 22       | GC[-GGA]A                  | -3bp     | 10%                    |
| 23       | GCGGAA                     | Wildtype | 51%                    |
| 23       | GC[-G]GAA                  | -1bp     | 12%                    |
| 24       | GCGGAA                     | Wildtype | 92%                    |
| 25       | GCGGAA                     | Wildtype | 76%                    |
| 25       | GC[-G]GAA                  | -1bp     | 7%                     |
| 26       | GCGGAA                     | Wildtype | 57%                    |
| 26       | GC[+G]GGAA                 | +1bp     | 33%                    |
| 27       | GCGGAA                     | Wildtype | 54%                    |
| 27       | GC[-G]GAA                  | -1bp     | 15%                    |

|    |                                                                                       |                  |     |
|----|---------------------------------------------------------------------------------------|------------------|-----|
| 28 | GC[-G]GAA                                                                             | -1bp             | 26% |
| 28 | GCGGAA                                                                                | Wildtype         | 19% |
| 28 | GC[+G]GGAA                                                                            | +1bp             | 8%  |
| 28 | [-GC]GGAA                                                                             | -2bp             | 8%  |
| 28 | [-CGTG]CGGAA                                                                          | -4bp             | 5%  |
| 29 | GCGGAA                                                                                | Wildtype         | 25% |
| 29 | GC[-G]GAA                                                                             | -1bp             | 20% |
| 29 | GC[+G]GGAA                                                                            | +1bp             | 6%  |
| 30 | GCGGAA                                                                                | Wildtype         | 85% |
| 31 | CTTTT[-GTGC]CT[-CCGATTGCCGTGCGGAAAGGAA]G[-<br>CTCTC]ACACTCCGGACGAAATCACGCGGCACAGACTAG | Complex deletion | 45% |
| 31 | GCGGAA                                                                                | Wildtype         | 27% |
| 31 | GC[-G]GAA                                                                             | -1bp             | 7%  |
| 32 | GCGGAA                                                                                | Wildtype         | 55% |
| 32 | GC[-G]GAA                                                                             | -1bp             | 12% |
| 33 | GCGGAA                                                                                | Wildtype         | 88% |
| 34 | GCGGAA                                                                                | Wildtype         | 82% |
| 35 | GCGGAA                                                                                | Wildtype         | 91% |
